# Supplementary material for: Barriers and Strategies to Optimize the Use of Glucagon-Like Peptide 1 Receptor Agonists in People with Type 2 Diabetes and High Cardiovascular Risk or Established Cardiovascular Disease: A Delphi Consensus in Spain
Source: PubMed Central journal article supplement — Adv Ther. 2024 Jul 22;41(9):3569–84. doi: 10.1007/s12325-024-02938-2 (PMC11349830; doi:10.1007/s12325-024-02938-2), 2024-07-22
Supplement: 12325_2024_2938_MOESM1_ESM.pdf [file 12325_2024_2938_MOESM1_ESM.pdf]

## Supplementary Material

### Barriers and Strategies to Optimize the Use of Glucagon-Like Peptide 1 Receptor Agonists in People with Type 2 Diabetes and High Cardiovascular Risk or Established Cardiovascular Disease: A Delphi Consensus in Spain

Manuel Botana López<sup>1,†</sup>, Miguel Camafort Babkowski<sup>2,†</sup>, Raquel Campuzano Ruiz<sup>3,†</sup>, Ana Cebrián Cuenca<sup>4,†</sup>, Manuel Gargallo Fernández<sup>5,†</sup>, Héctor David de Paz<sup>6</sup>, Jennifer Redondo-Antón<sup>7</sup>, Esther Artime<sup>7</sup>, Silvia Díaz-Cerezo<sup>7</sup>, Miriam Rubio de Santos<sup>7,\*</sup>

<sup>1</sup> Servicio de Endocrinología, Hospital Universitario Lucus Augusti, Lugo, Spain

<sup>2</sup> Servicio de Medicina Interna, ICMiD, Hospital Clínic, Barcelona; Departamento de Medicina, Universidad de Barcelona, and CiberOBN, Instituto de Salud Carlos III, Madrid, Spain

<sup>3</sup> Servicio de Cardiología, Hospital Universitario Fundación de Alcorcón, Madrid, Spain

<sup>4</sup> Medicina Familiar y Comunitaria, Centro de Salud Cartagena Casco, Cartagena, Spain; Biomedical Research Institute of Murcia (IMIB), Murcia, Spain

<sup>5</sup> Servicio de Endocrinología y Nutrición, Hospital Universitario Infanta Leonor, Madrid, and Fundación Jiménez Díaz, Madrid, Spain

<sup>6</sup> Outcomes'10, Parque Científico, Tecnológico y Empresarial, Jaume I University, Castellón de la Plana, Spain

<sup>7</sup> Eli Lilly and Company, Alcobendas, Madrid, Spain

† These authors contributed equally and on behalf of their medical societies.

#### \* Correspondence Details:

Name: Miriam Rubio de Santos

Address: Eli Lilly and Company,  
Avda. de la Industria 30,  
Alcobendas, 28108 Madrid, Spain

Phone: +34 634220677

Email: rubio\_miriam@lilly.com

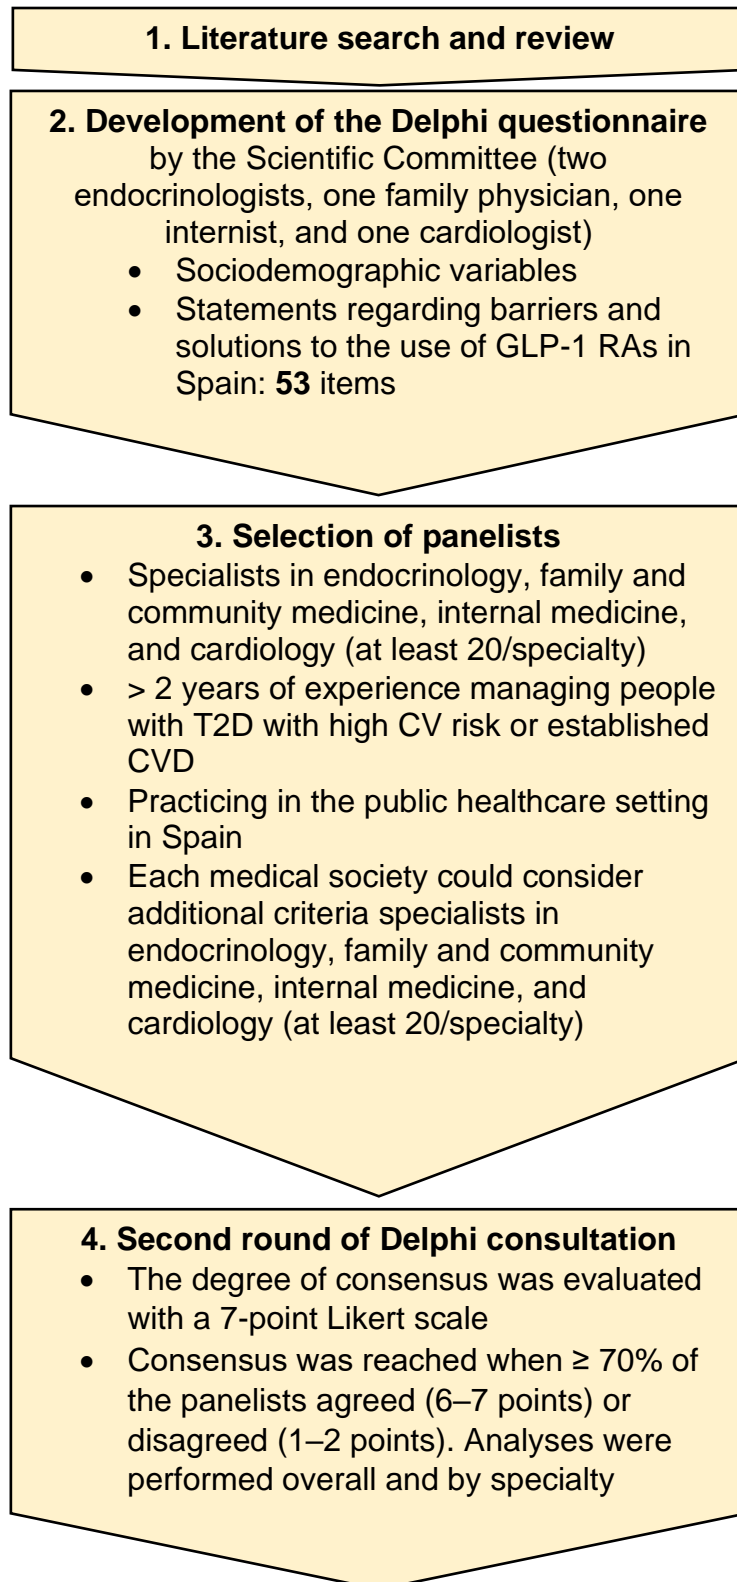

**Fig. S1** Scheme of the Delphi consultation process. *CV* cardiovascular, *CVD* cardiovascular disease, *GLP-1 RAs* glucagon-like peptide 1 receptor agonists, *T2D* type 2 diabetes

**Table S1** The Delphi questionnaire

---

**SECTION A**

***Sociodemographic characteristics and of clinical practice***

---

1. Gender:
  - Man
  - Woman
2. Age: \_\_\_ years
3. Specialty:
  - Family and Community Medicine
  - Endocrinology
  - Internal medicine
  - Cardiology
4. Years of experience in the management of people with T2D and/or high-risk CV or CVD established (not counting years of residence): \_\_\_ years
5. Approximately, what number of patients do you see weekly in your practice? \_\_\_ patients
6. Approximately, what percentage of patients seen in your practice have a diagnosis of T2D? \_\_\_ %
7. Approximately, what percentage of people with T2D seen in your practice have high CV risk or established CVD? \_\_\_ %
8. Approximately, in what percentage of people with T2D and high CV risk or established CVD have you prescribed treatment with GLP-1 RA? \_\_\_ %

***Characteristics of the working place***

9. Autonomous Community in which he/she practices his/her profession:
  10. Do you belong to any working groups related to diabetes and/or CV risk?
    - Yes
    - No
  11. Level of care of your main workplace:
    - First level of care (primary care centers, health centers)
    - Second level of care (specialty centers and area hospitals)
    - Third level of care (reference hospitals)
  12. Is there a diabetes unit in your workplace?
    - Yes
    - No
- 

**SECTION B**

***Barriers to GLP-1 RA use in people with T2D with high CV risk or established CVD***

---

***Treatment***

---

1. The choice of drug T2D treatment is complex due to the large number of pharmacological agents available.
  2. The traditional stepwise approach to T2D treatment contributes to the late use of GLP-1 RAs.
-

- 
3. Injectable treatments have traditionally been used in later stages of the disease, limiting the early access to GLP-1 RAs.
  4. The inertia of using the most potent drugs for later stages of the disease limits the early use of GLP-1 RAs.
  5. There is therapeutic inertia that induces a glyco-centric approach to diabetes and does not cover the CV risk prevention approach.
  6. Restrictions at the regional or center level (1st, 2nd, and subsequent lines of treatment) limit the early access to GLP-1 RAs.
  7. The belief that the adherence and persistence rate of GLP-1 RAs is lower compared to other treatments limits their prescription.
  8. The injectable route of administration is a barrier for physicians in prescribing GLP-1 RAs.
  9. The potential gastrointestinal adverse effects limit GLP-1 RAs prescription.
  10. GLP-1 RAs cost is a barrier for patients who do not meet the insurance visa requirements (obesity), though they could take advantage of their CV benefit.
  11. Many healthcare professionals overestimate patients' refusal of injectable drugs.

#### *Healthcare process*

12. The insurance visa administrative procedures limit the prescription of GLP-1 RAs in clinical practice.
13. The insurance visa requirements (obesity) limit GLP-1 RAs prescription in people with T2D with high CV risk or established CVD.
14. GLP-1 RAs use recommendations included in some CPGs are not focused on CV risk control in people with T2D.
15. The absence of multidisciplinary teams limits the access to GLP-1 RAs for people with T2D with high CV risk or established CVD who could benefit from their use.
16. The absence of comprehensive and individualized treatment strategies based on comorbidities of people with T2D limits the use of GLP-1 RAs.
17. Not considering CV risk as a switching treatment factor in people with T2D and high CV risk or established CVD limits the prescription of GLP-1 RAs.
18. The assumption that GLP-1 RAs cannot be prescribed within my specialty (due to the insurance visa requirements) represents a barrier to their prescription.

#### *Healthcare organization and resources*

19. The lack of time in the consultation room limits the adherence to CPG recommendations on using GLP-1 RAs in clinical practice.
20. The lack of support staff to assess CV risk and/or educate patients on their treatment limits the GLP-1 RAs prescription.
21. The absence of a shared electronic medical record history between specialties limits GLP-1 RAs prescription in people with T2D with a high CV risk of established CVD.

#### *Healthcare education and training*

---

- 
22. The lack of awareness of the importance of CV prevention in people with T2D limits the use of GLP-1 RAs.
  23. The lack of awareness or conviction of the GLP-1 RAs benefits people with T2D limits their use.
  24. Healthcare professionals are unfamiliar with using GLP-1 RAs for CV risk control.

***Potential strategies to optimize the use of GLP-1 RAs and improve adherence to the recommendations of the Clinical Practice Guidelines***

1. Develop and implement simple treatment algorithms based on patient comorbidities.
  2. Develop and implement treatment algorithms common to all specialties.
  3. Promote a more patient-centered approach in treatment selection (based on personal medical history, lifestyle behaviors, and CV and metabolic risk factors).
  4. Educate patients in the care of their disease.
  5. Promote shared decision-making models that incorporate patients' values and preferences in treatment selection (shared decision-making tools, nursing involvement, etc.).
  6. Inform patients about the essential characteristics of their treatment, including possible adverse events and the recommendations to minimize them.
  7. Implementation of automatic treatment renewal by electronic prescription.
  8. Review the GLP-1 RAs inspection visa requirements, including the indication for people with T2D with established CVD
  9. Create automated alert systems for people with T2D with established CVD who are not receiving adequate treatment based on their CV risk.
  10. Consider all people with T2D as high CV risk patients.
  11. Implement treatment optimization protocols in people with T2D with hospital admissions due to a recent CVD.
  12. Promote the optimal management of people with T2D after CVD through their inclusion in cardiac rehabilitation programs.
  13. Increase the nursing involvement in screening for comorbidities and/or patient education.
  14. Create the nurse/case manager figure to facilitate transversal patient care.
  15. Establish a rapid and fluid collaboration culture between professionals (multidisciplinary/interdisciplinary) appropriate to each center's characteristics, ensuring minimum coordination/referral criteria between specialties.
  16. Establish a multidisciplinary and bidirectional e-consultation model.
  17. Promote the cooperation between scientific societies to develop updated multidisciplinary consensus guidelines that consider the importance of CV risk control.
-

- 
18. Implement shared access systems of the medical records to facilitate communication between specialties.
  19. Encourage the creation of diabetes units, coordination groups, or care committees.
  20. Increment the consultation time for those patients who require it.
  21. Facilitate prescription activities in the consultation room (for example, through direct access to the treatment algorithms in the electronic medical record).
  22. Promote the divulgation of the new treatment algorithms by the different scientific societies and/or the industry.
  23. Implement treatment adherence evaluation systems accessible to all involved specialties.
  24. Train health care professionals (including administrators) on the central role of CV risk in people with T2D.
  25. Promote and develop training initiatives on GLP-1 RAs efficacy and CV benefit.
  26. Promote training programs adapted to different professional profiles (residents, GPs, experts, etc.), including the training on fundamental concepts to reach less experienced professionals in the use of GLP-1 RAs.
  27. Define innovative training strategies (e.g., case studies, on-line, etc.).
  28. Promote incentivized training programs (within working hours, integrated within promotion plans, etc.).

---

*CPG* clinical practice guideline, *CV* cardiovascular, *CVD* cardiovascular disease, *GLP-1 RAs* glucagon-like peptide 1 receptor agonists, *T2D* type 2 diabetes

**Table S2** Potential barriers to the use of GLP-1 RAs: results by subgroups

| Barriers                                                                                                                                                     | Agreement (6–7), %        |                        |                                  |                                                 |
|--------------------------------------------------------------------------------------------------------------------------------------------------------------|---------------------------|------------------------|----------------------------------|-------------------------------------------------|
|                                                                                                                                                              | Endocrinology<br>(N = 33) | Cardiology<br>(N = 22) | Internal<br>medicine<br>(N = 22) | Family and<br>community<br>medicine<br>(N = 19) |
| <b>Treatment</b>                                                                                                                                             |                           |                        |                                  |                                                 |
| 1. The choice of drug T2D treatment is complex due to the large number of pharmacological agents available                                                   | 39.4                      | 13.6                   | 45.5                             | 36.8                                            |
| 2. The traditional stepwise approach to T2D treatment contributes to the late use of GLP-1 RAs                                                               | 90.9                      | 72.7                   | 81.8                             | 73.7                                            |
| 3. Injectable treatments have traditionally been used in later stages of the disease, limiting the early access to GLP-1 RAs                                 | 72.7                      | 77.3                   | 77.3                             | 80.0                                            |
| 4. The inertia of using the most potent drugs for later stages of the disease limits the early use of GLP-1 RAs                                              | 78.8                      | 63.6                   | 77.3                             | 63.2                                            |
| 5. There is therapeutic inertia that induces a glyco-centric approach to diabetes and does not cover the CV risk prevention approach                         | 90.9                      | 86.4                   | 81.8                             | 68.4                                            |
| 6. Restrictions at the regional or center level (1st, 2nd, and subsequent lines of treatment) limit the early access to GLP-1 RAs                            | 90.9                      | 90.9                   | 68.2                             | 73.7                                            |
| 7. The belief that the adherence and persistence rate of GLP-1 RAs is lower compared to other treatments limits their prescription                           | 18.2                      | 0.0                    | 22.7                             | 5.3                                             |
| 8. The injectable route of administration is a barrier for physicians in prescribing GLP-1 RAs                                                               | 57.6                      | 59.1                   | 59.1                             | 52.6                                            |
| 9. The potential gastrointestinal adverse effects limit GLP-1 RAs prescription                                                                               | 21.2                      | 9.1                    | 13.6                             | 15.8                                            |
| 10. GLP-1 RAs cost is a barrier for patients who do not meet the insurance visa requirements (obesity), though they could take advantage of their CV benefit | 93.9                      | 86.4                   | 90.9                             | 85.0                                            |
| 11. Many healthcare professionals overestimate patients' refusal of injectable drugs                                                                         | 84.8                      | 81.8                   | 68.2                             | 65.0                                            |
| <b>Healthcare process</b>                                                                                                                                    |                           |                        |                                  |                                                 |
| 12. The insurance visa administrative procedures limit the prescription of GLP-1 RAs in clinical practice                                                    | 84.8                      | 81.8                   | 72.7                             | 57.9                                            |
| 13. The insurance visa requirements (obesity) limit GLP-1 RAs prescription in people with T2D with high CV risk or established CVD                           | 84.8                      | 77.3                   | 86.4                             | 70.0                                            |

| Barriers                                                                                                                                                                 | Agreement (6–7), %        |                        |                                  |                                                 |
|--------------------------------------------------------------------------------------------------------------------------------------------------------------------------|---------------------------|------------------------|----------------------------------|-------------------------------------------------|
|                                                                                                                                                                          | Endocrinology<br>(N = 33) | Cardiology<br>(N = 22) | Internal<br>medicine<br>(N = 22) | Family and<br>community<br>medicine<br>(N = 19) |
| 14. GLP-1 RAs use recommendations included in some CPGs are not focused on CV risk control in people with T2D                                                            | 24.2                      | 54.5                   | 31.8                             | 21.1                                            |
| 15. The absence of multidisciplinary teams limits the access to GLP-1 RAs for people with T2D with high CV risk or established CVD who could benefit from their use      | 63.6                      | 54.5                   | 18.2                             | 5.3                                             |
| 16. The absence of comprehensive and individualized treatment strategies based on comorbidities of people with T2D limits the use of GLP-1 RAs                           | 81.8                      | 77.3                   | 68.2                             | 47.4                                            |
| 17. Not considering CV risk as a switching treatment factor in people with T2D and high CV risk or established CVD limits the prescription of GLP-1 RAs                  | 75.8                      | 86.4                   | 77.3                             | 70.0                                            |
| 18. The assumption that GLP-1 RAs cannot be prescribed within my specialty (due to the inspection visa requirements) represents a barrier to their prescription          | 42.4                      | 50.0                   | 36.4                             | 5.3                                             |
| <b>Healthcare organization and resources</b>                                                                                                                             |                           |                        |                                  |                                                 |
| 19. The lack of time in the consultation room limits the adherence to CPG recommendations on using GLP-1 RAs in clinical practice                                        | 54.5                      | 45.5                   | 40.9                             | 31.6                                            |
| 20. The lack of support staff to assess CV risk and/or educate patients on their treatment limits the GLP-1 RAs prescription                                             | 60.6                      | 40.9                   | 40.9                             | 21.1                                            |
| 21. The absence of a shared electronic medical record history between specialties limits GLP1-RAs prescription in people with T2D with a high CV risk of established CVD | 45.5                      | 27.3                   | 18.2                             | 26.3                                            |
| <b>Healthcare education and training</b>                                                                                                                                 |                           |                        |                                  |                                                 |
| 22. The lack of awareness of the importance of CV prevention in people with T2D limits the use of GLP RAs                                                                | 84.8                      | 90.9                   | 72.7                             | 63.2                                            |
| 23. The lack of awareness or conviction of the GLP-1 RAs benefits people with T2D limits their use                                                                       | 78.8                      | 90.9                   | 72.7                             | 63.2                                            |
| 24. Healthcare professionals are unfamiliar with using GLP-1 RAs for CV risk control                                                                                     | 69.7                      | 81.8                   | 72.7                             | 73.7                                            |

Data after the two rounds of Delphi consultation are included here (i.e., results from the round in which each statement reached consensus or results from the second round for those items not reaching consensus)



In green, the barriers that reached  $\geq 70\%$  of consensus; in red, the barriers that did not reach 70% of consensus  
*CPG* clinical practice guideline, *CV* cardiovascular, *CVD* cardiovascular disease, *GLP-1 RAs* glucagon-like peptide 1 receptor agonists, *N* number of physicians,  
*T2D* type 2 diabetes

**Table S3** Potential strategies to optimize the use of GLP-1 RAs and improve adherence to the recommendations of clinical practice guidelines: results by subgroups

| Potential solutions                                                                                                                                                         | Agreement (6–7), %        |                        |                                  |                                                 |
|-----------------------------------------------------------------------------------------------------------------------------------------------------------------------------|---------------------------|------------------------|----------------------------------|-------------------------------------------------|
|                                                                                                                                                                             | Endocrinology<br>(N = 33) | Cardiology<br>(N = 22) | Internal<br>medicine<br>(N = 22) | Family and<br>community<br>medicine<br>(N = 19) |
| 1. Develop and implement simple treatment algorithms based on patient comorbidities                                                                                         |                           |                        |                                  |                                                 |
| Suitability                                                                                                                                                                 | 87.9                      | 81.8                   | 90.9                             | 90.0                                            |
| Feasibility                                                                                                                                                                 | 75.8                      | 72.7                   | 81.8                             | 85.0                                            |
| 2. Develop and implement treatment algorithms common to all specialties                                                                                                     |                           |                        |                                  |                                                 |
| Suitability                                                                                                                                                                 | 78.8                      | 86.4                   | 95.5                             | 90.0                                            |
| Feasibility                                                                                                                                                                 | 57.6                      | 45.5                   | 72.7                             | 47.4                                            |
| 3. Promote a more patient-centered approach in treatment selection (based on personal medical history, lifestyle behaviors, and CV and metabolic risk factors)              |                           |                        |                                  |                                                 |
| Suitability                                                                                                                                                                 | 93.9                      | 81.8                   | 90.9                             | 95.0                                            |
| Feasibility                                                                                                                                                                 | 81.8                      | 81.8                   | 72.7                             | 78.9                                            |
| 4. Educate patients in the care of their disease                                                                                                                            |                           |                        |                                  |                                                 |
| Suitability                                                                                                                                                                 | 87.9                      | 90.9                   | 90.9                             | 90.0                                            |
| Feasibility                                                                                                                                                                 | 60.6                      | 36.4                   | 77.3                             | 47.4                                            |
| 5. Promote shared decision-making models that incorporate patients' values and preferences in treatment selection (shared decision-making tools, nursing involvement, etc.) |                           |                        |                                  |                                                 |
| Suitability                                                                                                                                                                 | 84.8                      | 81.8                   | 81.8                             | 95.0                                            |
| Feasibility                                                                                                                                                                 | 54.5                      | 31.8                   | 40.9                             | 47.4                                            |
| 6. Inform patients about the essential characteristics of their treatment, including possible adverse events and the recommendations to minimize them                       |                           |                        |                                  |                                                 |
| Suitability                                                                                                                                                                 | 90.9                      | 90.9                   | 81.8                             | 80.0                                            |
| Feasibility                                                                                                                                                                 | 93.9                      | 72.7                   | 77.3                             | 78.9                                            |
| 7. Implementation of automatic treatment renewal by electronic prescription                                                                                                 |                           |                        |                                  |                                                 |
| Suitability                                                                                                                                                                 | 97.0                      | 90.9                   | 95.5                             | 90.0                                            |

| Potential solutions                                                                                                                        | Agreement (6-7), %        |                        |                                  |                                                 |
|--------------------------------------------------------------------------------------------------------------------------------------------|---------------------------|------------------------|----------------------------------|-------------------------------------------------|
|                                                                                                                                            | Endocrinology<br>(N = 33) | Cardiology<br>(N = 22) | Internal<br>medicine<br>(N = 22) | Family and<br>community<br>medicine<br>(N = 19) |
| Feasibility                                                                                                                                | 90.9                      | 81.8                   | 81.8                             | 90.0                                            |
| 8. Review the GLP-1 RAs inspection visa requirements, including the indication for people with T2D with established CVD                    |                           |                        |                                  |                                                 |
| Suitability                                                                                                                                | 100.0                     | 95.5                   | 95.5                             | 95.0                                            |
| Feasibility                                                                                                                                | 75.8                      | 50.0                   | 59.1                             | 68.4                                            |
| 9. Create automated alert systems for people with T2D with established CVD who are not receiving adequate treatment based on their CV risk |                           |                        |                                  |                                                 |
| Suitability                                                                                                                                | 93.9                      | 95.5                   | 81.8                             | 90.0                                            |
| Feasibility                                                                                                                                | 66.7                      | 54.5                   | 50.0                             | 63.2                                            |
| 10. Consider all people with T2D as high CV risk patients                                                                                  |                           |                        |                                  |                                                 |
| Suitability                                                                                                                                | 84.8                      | 81.8                   | 77.3                             | 63.2                                            |
| Feasibility                                                                                                                                | 81.8                      | 81.8                   | 72.7                             | 57.9                                            |
| 11. Implement treatment optimization protocols in people with T2D with hospital admissions due to a recent CVD                             |                           |                        |                                  |                                                 |
| Suitability                                                                                                                                | 87.9                      | 95.5                   | 90.9                             | 85.0                                            |
| Feasibility                                                                                                                                | 81.8                      | 81.8                   | 68.2                             | 78.9                                            |
| 12. Promote the optimal management of people with T2D after CVD through their inclusion in cardiac rehabilitation programs                 |                           |                        |                                  |                                                 |
| Suitability                                                                                                                                | 87.9                      | 86.4                   | 77.3                             | 100.0                                           |
| Feasibility                                                                                                                                | 84.8                      | 59.1                   | 45.5                             | 42.1                                            |
| 13. Increase the nursing involvement in screening for comorbidities and/or patient education                                               |                           |                        |                                  |                                                 |
| Suitability                                                                                                                                | 81.8                      | 95.5                   | 90.9                             | 95.0                                            |
| Feasibility                                                                                                                                | 63.6                      | 68.2                   | 54.5                             | 84.2                                            |
| 14. Create the nurse/case manager figure to facilitate transversal patient care                                                            |                           |                        |                                  |                                                 |
| Suitability                                                                                                                                | 78.8                      | 72.7                   | 68.2                             | 60.0                                            |
| Feasibility                                                                                                                                | 48.5                      | 40.9                   | 27.3                             | 57.9                                            |

| Potential solutions                                                                                                                                                                                                                 | Agreement (6-7), %        |                        |                                  |                                                 |
|-------------------------------------------------------------------------------------------------------------------------------------------------------------------------------------------------------------------------------------|---------------------------|------------------------|----------------------------------|-------------------------------------------------|
|                                                                                                                                                                                                                                     | Endocrinology<br>(N = 33) | Cardiology<br>(N = 22) | Internal<br>medicine<br>(N = 22) | Family and<br>community<br>medicine<br>(N = 19) |
| 15. Establish a rapid and fluid collaboration culture between professionals (multidisciplinary/interdisciplinary) appropriate to each center's characteristics, ensuring minimum coordination/referral criteria between specialties |                           |                        |                                  |                                                 |
| Suitability                                                                                                                                                                                                                         | 93.9                      | 86.4                   | 95.5                             | 95.0                                            |
| Feasibility                                                                                                                                                                                                                         | 72.7                      | 45.5                   | 50.0                             | 57.9                                            |
| 16. Establish a multidisciplinary and bidirectional e-consultation model                                                                                                                                                            |                           |                        |                                  |                                                 |
| Suitability                                                                                                                                                                                                                         | 81.8                      | 86.4                   | 81.8                             | 100.0                                           |
| Feasibility                                                                                                                                                                                                                         | 75.8                      | 77.3                   | 68.2                             | 73.7                                            |
| 17. Promote the cooperation between scientific societies to develop updated multidisciplinary consensus guidelines that consider the importance of CV risk control                                                                  |                           |                        |                                  |                                                 |
| Suitability                                                                                                                                                                                                                         | 87.9                      | 90.9                   | 95.5                             | 95.0                                            |
| Feasibility                                                                                                                                                                                                                         | 81.8                      | 72.7                   | 81.8                             | 63.2                                            |
| 18. Implement shared access systems of the medical records to facilitate communication between specialties                                                                                                                          |                           |                        |                                  |                                                 |
| Suitability                                                                                                                                                                                                                         | 87.9                      | 95.5                   | 100.0                            | 95.0                                            |
| Feasibility                                                                                                                                                                                                                         | 60.6                      | 81.8                   | 72.7                             | 80.0                                            |
| 19. Encourage the creation of diabetes units, coordination groups, or care committees                                                                                                                                               |                           |                        |                                  |                                                 |
| Suitability                                                                                                                                                                                                                         | 87.9                      | 59.1                   | 54.5                             | 68.4                                            |
| Feasibility                                                                                                                                                                                                                         | 75.8                      | 31.8                   | 31.8                             | 36.8                                            |
| 20. Increment the consultation time for those patients who require it                                                                                                                                                               |                           |                        |                                  |                                                 |
| Suitability                                                                                                                                                                                                                         | 97.0                      | 86.4                   | 86.4                             | 95.0                                            |
| Feasibility                                                                                                                                                                                                                         | 36.4                      | 27.3                   | 13.6                             | 15.8                                            |
| 21. Facilitate prescription activities in the consultation room (for example, through direct access to the treatment algorithms in the electronic medical record)                                                                   |                           |                        |                                  |                                                 |
| Suitability                                                                                                                                                                                                                         | 81.8                      | 77.3                   | 63.6                             | 80.0                                            |
| Feasibility                                                                                                                                                                                                                         | 33.3                      | 50.0                   | 27.3                             | 40.0                                            |

| Potential solutions                                                                                                                                                                                                      | Agreement (6-7), %        |                        |                                  |                                                 |
|--------------------------------------------------------------------------------------------------------------------------------------------------------------------------------------------------------------------------|---------------------------|------------------------|----------------------------------|-------------------------------------------------|
|                                                                                                                                                                                                                          | Endocrinology<br>(N = 33) | Cardiology<br>(N = 22) | Internal<br>medicine<br>(N = 22) | Family and<br>community<br>medicine<br>(N = 19) |
| 22. Promote the divulgation of the new treatment algorithms by the different scientific societies and/or the industry                                                                                                    |                           |                        |                                  |                                                 |
| Suitability                                                                                                                                                                                                              | 81.8                      | 95.5                   | 81.8                             | 80.0                                            |
| Feasibility                                                                                                                                                                                                              | 75.8                      | 90.9                   | 63.6                             | 85.0                                            |
| 23. Implement treatment adherence evaluation systems accessible to all involved specialties                                                                                                                              |                           |                        |                                  |                                                 |
| Suitability                                                                                                                                                                                                              | 84.8                      | 90.9                   | 77.3                             | 100.0                                           |
| Feasibility                                                                                                                                                                                                              | 66.7                      | 63.6                   | 36.4                             | 52.6                                            |
| 24. Train health care professionals (including administrators) on the central role of CV risk in people with T2D                                                                                                         |                           |                        |                                  |                                                 |
| Suitability                                                                                                                                                                                                              | 90.9                      | 95.5                   | 95.5                             | 90.0                                            |
| Feasibility                                                                                                                                                                                                              | 72.7                      | 63.6                   | 50.0                             | 52.6                                            |
| 25. Promote and develop training initiatives on GLP-1 RAs efficacy and CV benefit                                                                                                                                        |                           |                        |                                  |                                                 |
| Suitability                                                                                                                                                                                                              | 84.8                      | 95.5                   | 86.4                             | 95.0                                            |
| Feasibility                                                                                                                                                                                                              | 81.8                      | 81.8                   | 72.7                             | 80.0                                            |
| 26. Promote training programs adapted to different professional profiles (residents, GPs, experts, etc.), including the training on fundamental concepts to reach less experienced professionals in the use of GLP-1 RAs |                           |                        |                                  |                                                 |
| Suitability                                                                                                                                                                                                              | 93.9                      | 95.5                   | 86.4                             | 75.0                                            |
| Feasibility                                                                                                                                                                                                              | 87.9                      | 72.7                   | 81.8                             | 78.9                                            |
| 27. Define innovative training strategies (e.g., case studies, on-line, etc.)                                                                                                                                            |                           |                        |                                  |                                                 |
| Suitability                                                                                                                                                                                                              | 87.9                      | 81.8                   | 59.1                             | 75.0                                            |
| Feasibility                                                                                                                                                                                                              | 90.9                      | 68.2                   | 72.7                             | 84.2                                            |
| 28. Promote incentivized training programs (within working hours, integrated within promotion plans, etc.)                                                                                                               |                           |                        |                                  |                                                 |
| Suitability                                                                                                                                                                                                              | 84.8                      | 81.8                   | 59.1                             | 95.0                                            |
| Feasibility                                                                                                                                                                                                              | 45.5                      | 31.8                   | 40.9                             | 42.1                                            |

Data after the two rounds of Delphi consultation are included here (i.e., results from the round in which each statement reached consensus or results from the second round for those items not reaching consensus)

In green, the barriers that reached  $\geq 70\%$  of consensus; in red, the barriers that did not reach 70% of consensus

*CV* cardiovascular, *CVD* cardiovascular disease, *GLP-1 RAs* glucagon-like peptide 1 receptor agonists, *GPs* general practitioners, *N* number of physicians, *T2D* type 2 diabetes
